# Supplementary material for: The crucial role of age and site in incidence and prognosis of female neuroendocrine neoplasms in the United States: a population-based study from 2000 to 2018
Source: publisher site journal article supplement (doi:10.18632/aging.205573), 2024-03-01
Supplement: Supplementary file [file aging-v16i5-205573-supplementary-material-SD1.pdf]

## SUPPLEMENTARY FIGURES

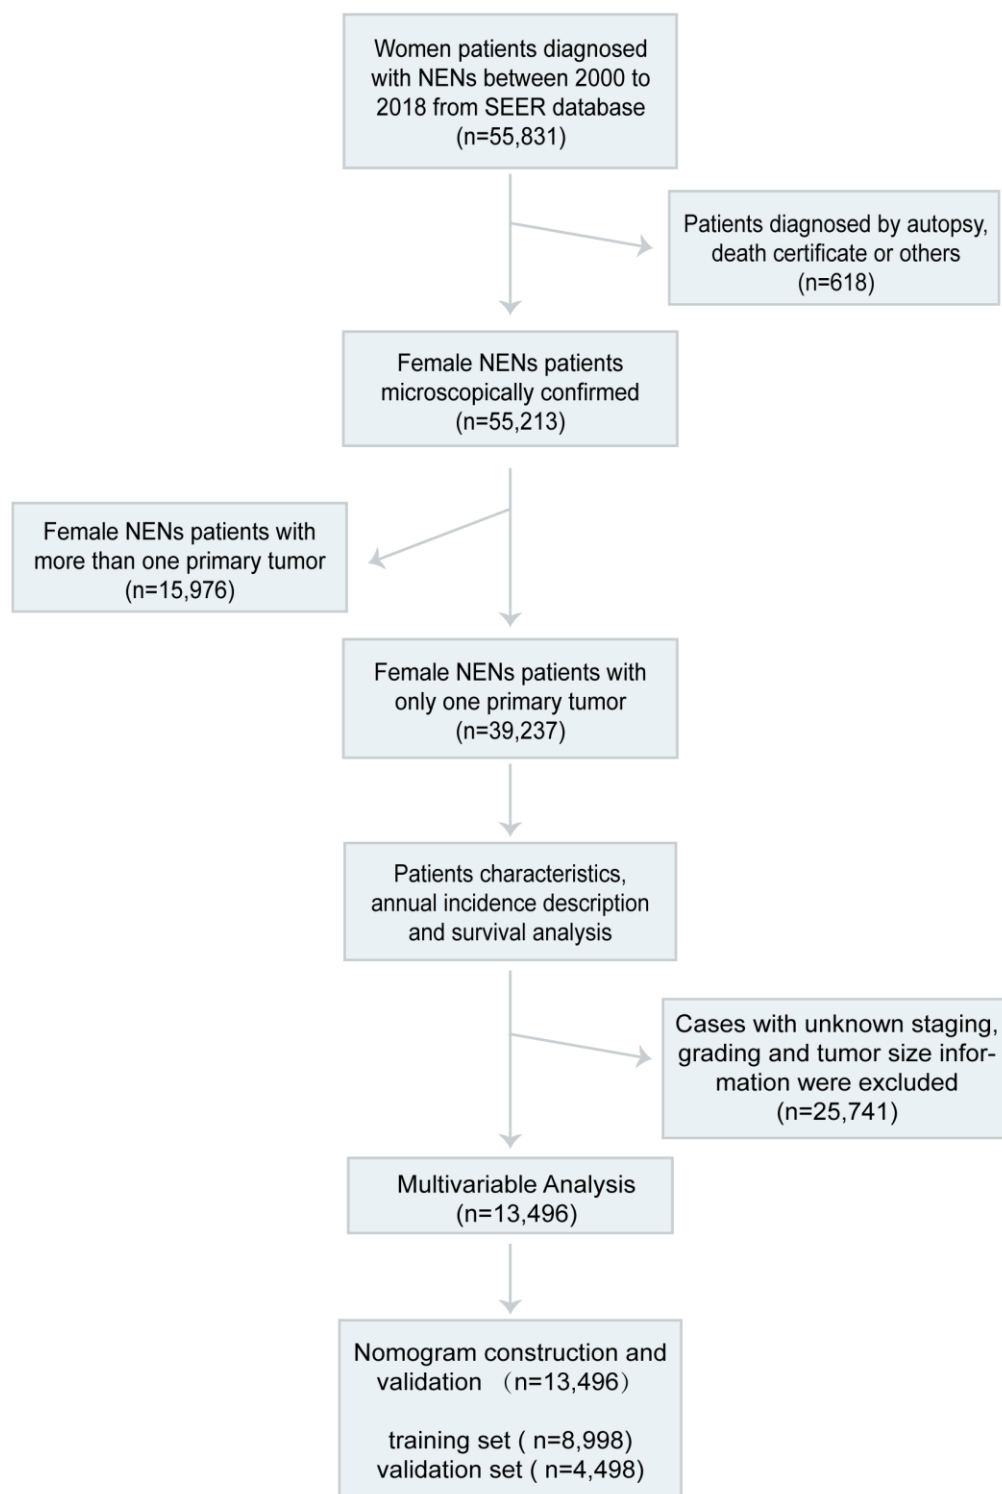

Supplementary Figure 1. Flowchart of patient selection and study design.

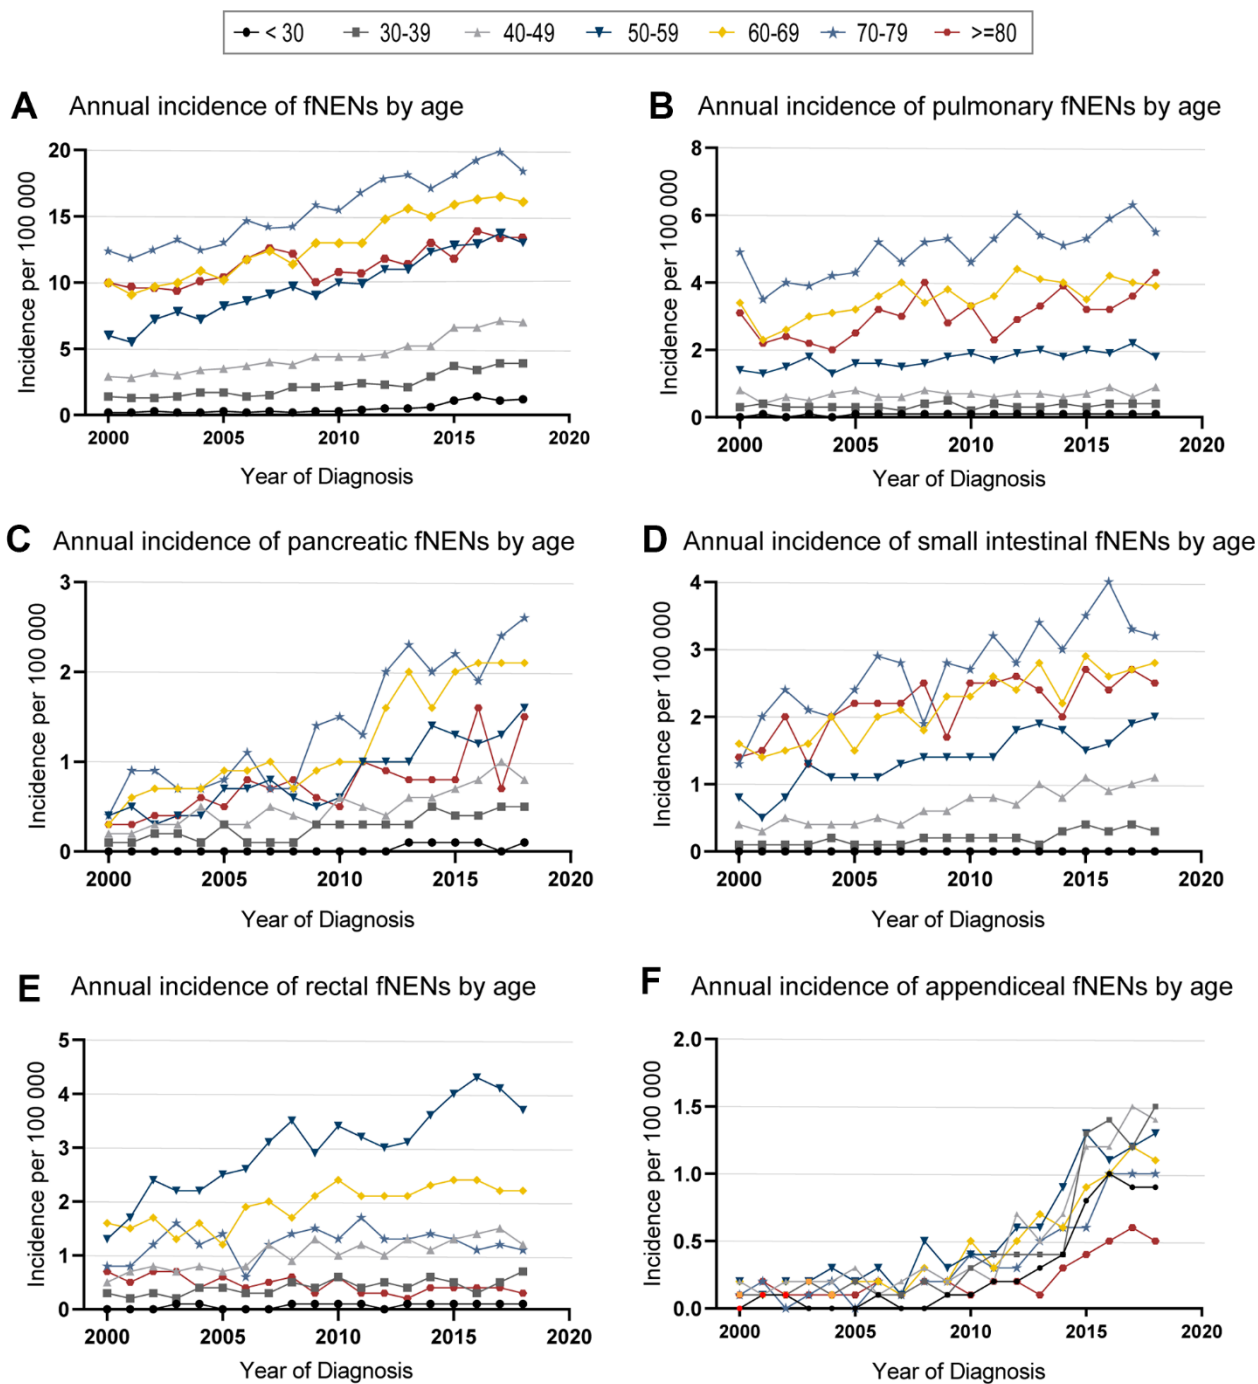

**Supplementary Figure 2. Incidence in total and common sites of female neuroendocrine neoplasms (fNENs) by detailed age.** The incidence on detailed age in all fNENs (A), pulmonary fNENs (B), pancreatic fNENs (C), intestinal fNENs (D), rectal fNENs (E), and appendiceal fNENs (F).

**A Overall survival of fNENs by grade**

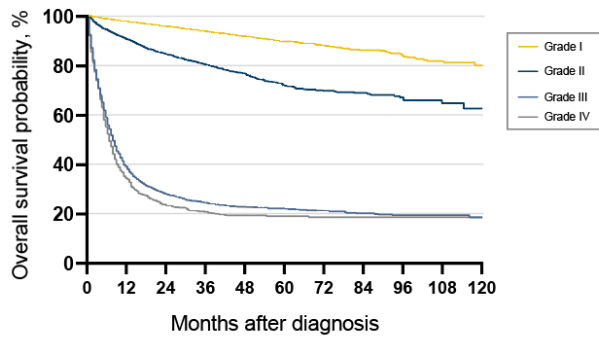

**B Overall survival of fNENs by stage**

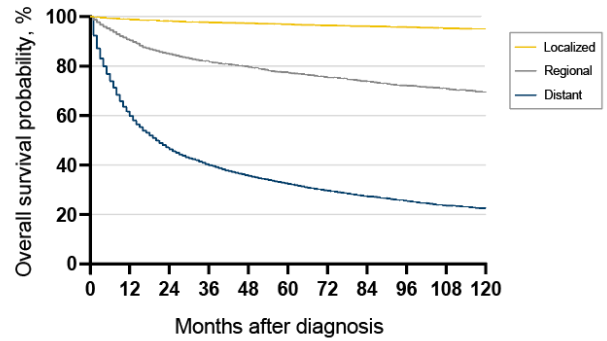

**C Overall survival of fNENs by race**

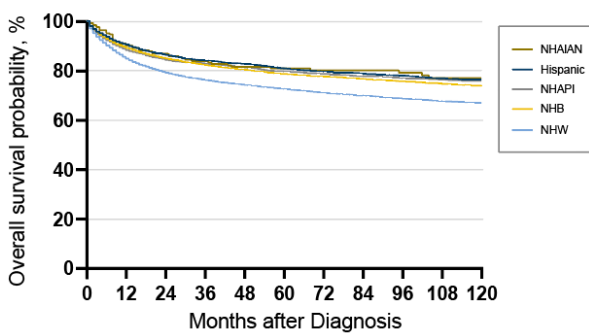

**D Overall survival of fNENs by site**

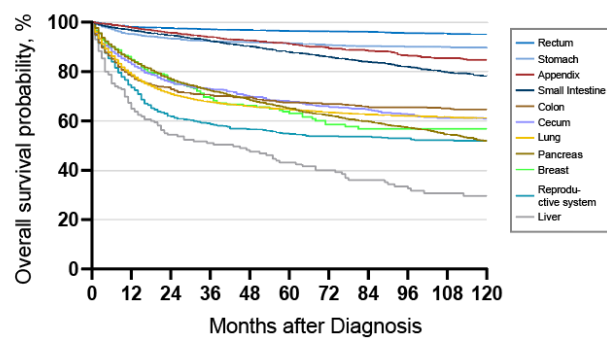

**Supplementary Figure 3. The survival curve of fNENs by grade, stage, race, and sites.** The survival curve of fNENs by grade (A), stage (B), race (C), and primary site (D).
